# Supplementary material for: Removal of Hexavalent Chromium From Wastewater by Cu/Fe Bimetallic Nanoparticles
Source: Research Square preprint supplement (doi:10.21203/rs.3.rs-123533/v1), 2020-12-11
Supplement: Supplementary file 1 [file 1ec6671e5a02c3e9091afa2d.docx]

**Supplemental Information**

**Removal of hexavalent chromium from wastewater by** **Cu/Fe bimetallic nanoparticles**

**Jien Ye 1,2, Yi Wang 1,2, Qiao Xu1,2, Hanxin Wu1,2, Jianhao Tong1,2, Jiyan Shi 1,2***

1 Department of Environmental Engineering, College of Environmental and Resource Sciences, Zhejiang University, Hangzhou 310058, China;

2 MOE Key Laboratory of Environment Remediation and Ecological Health, College of Environmental & Resource Science, Zhejiang University, Hangzhou 310058, China;

*Corresponding author

Jiyan Shi

Tel.: +86-571-8898-2019; Fax: +86-571-8898-2019; E-mail: [shijiyan@zju.edu.cn](mailto:shijiyan@zju.edu.cn)

**Number of pages: 5**

**Number of figures: 4**

**Contents:**

**Fig. S1** Effect of copper loading rates on the kinetics of Cr(VI) reduction by Cu/Fe bimetallic nanoparticles.

**Fig. S2** Effect of initial pH on the kinetics of Cr(VI) reduction by Cu/Fe bimetallic nanoparticles.

**Fig. S3** Effect of initial Cr(VI) concentrations on the kinetics of Cr(VI) reduction by Cu/Fe bimetallic nanoparticles.

**Fig. S4** Zeta potential of nZVI and Cu/Fe bimetallic nanoparticles with different pH.


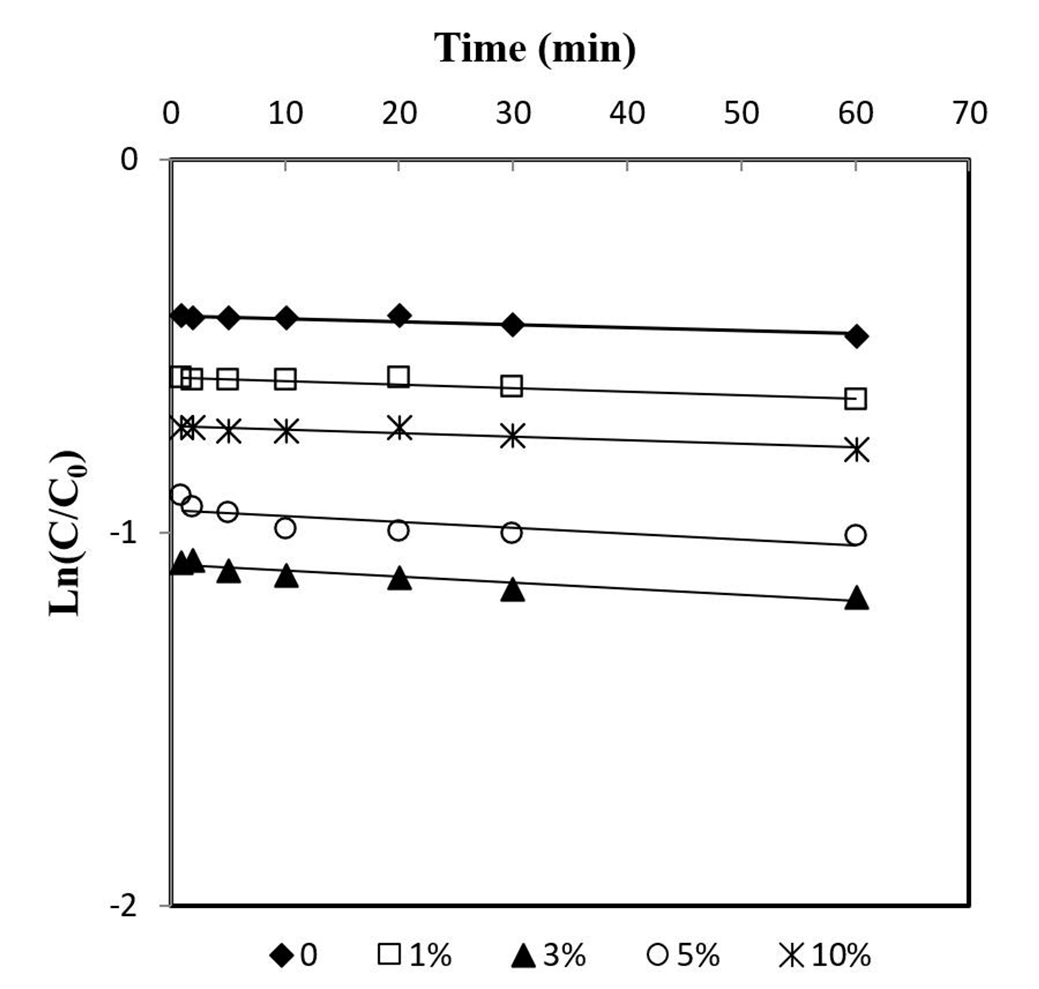


Fig. S1 Effect of copper loading rates on the kinetics of Cr(VI) reduction by Cu/Fe bimetallic nanoparticles


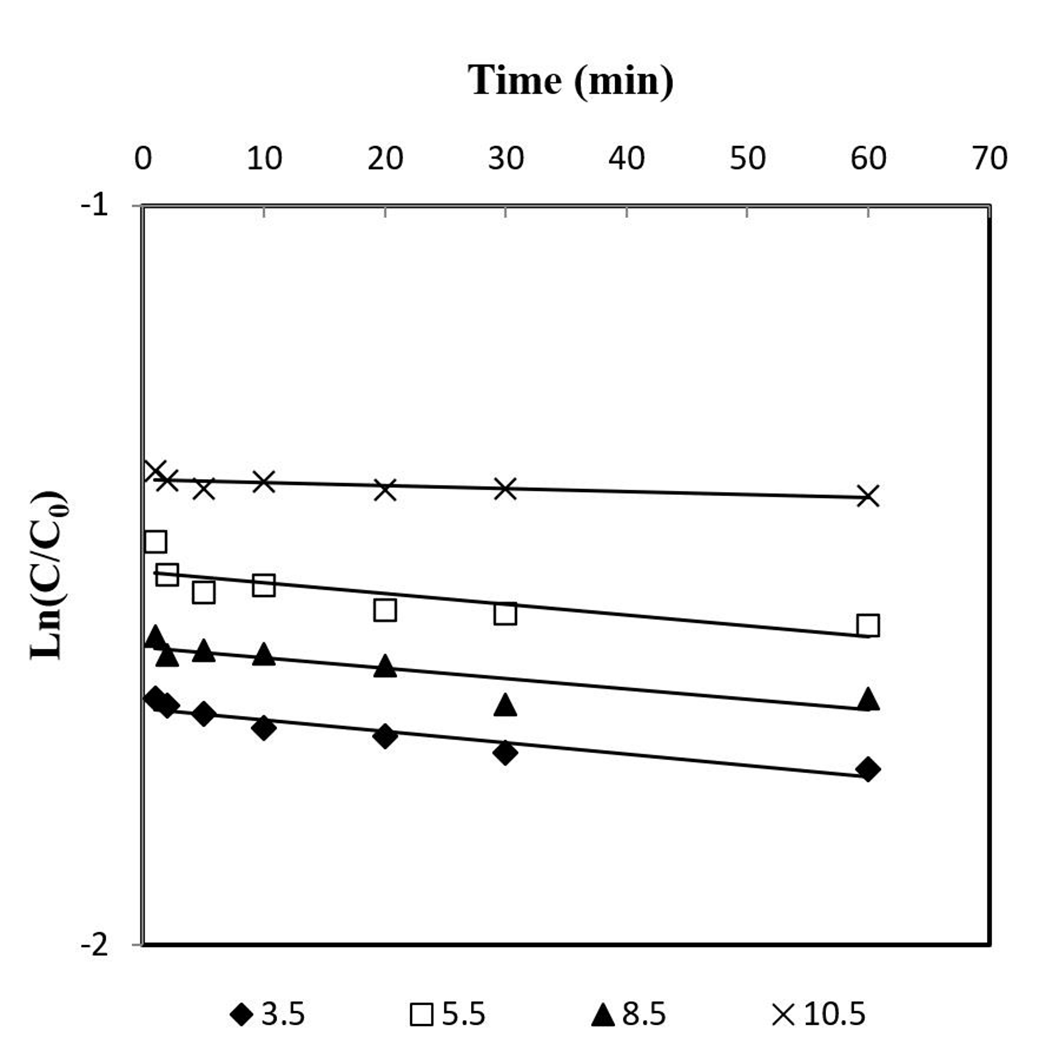


Fig. S2 Effect of initial pH on the kinetics of Cr(VI) reduction by Cu/Fe bimetallic nanoparticles


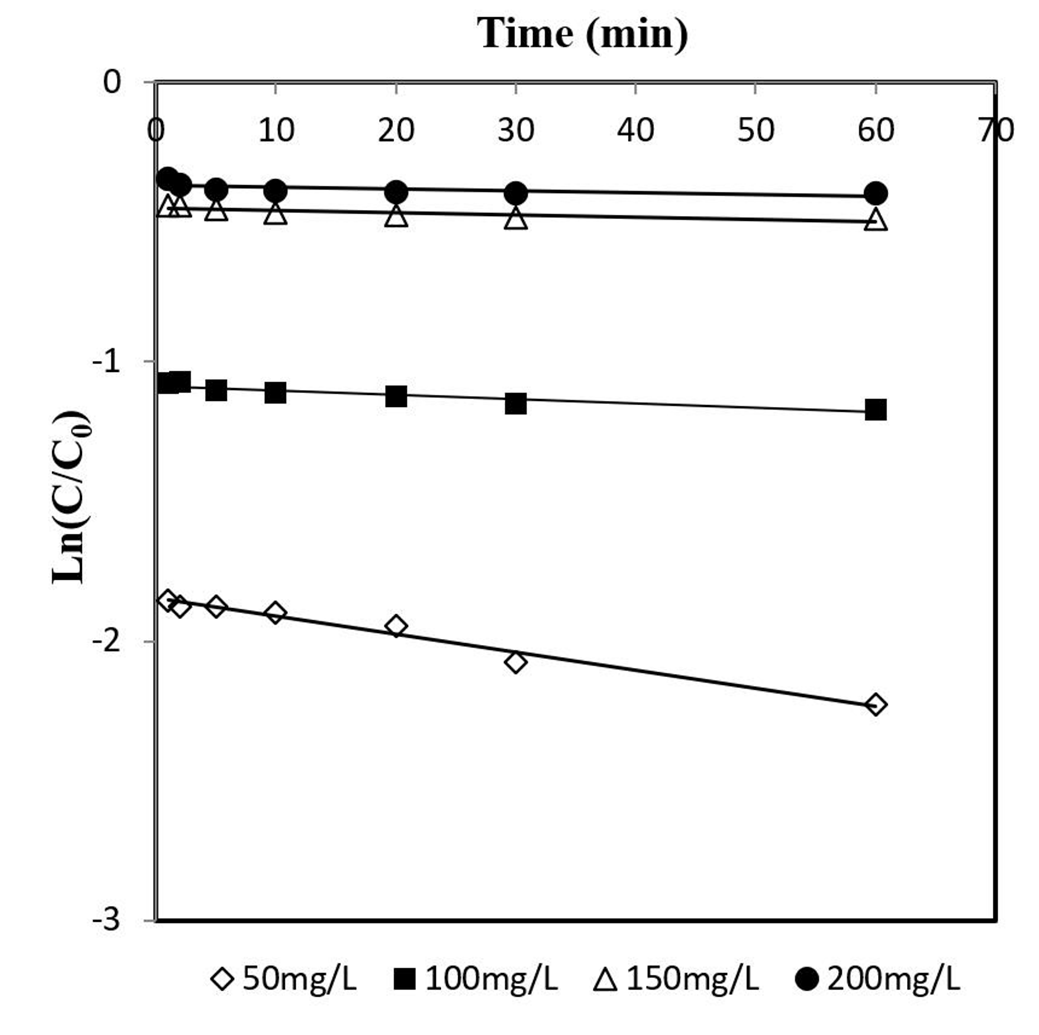


Fig. S3 Effect of initial Cr(VI) concentrations on the kinetics of Cr(VI) reduction by Cu/Fe bimetallic nanoparticles





Fig. S4 Zeta potential of nZVI and Cu/Fe bimetallic nanoparticles with different pH
